# Supplementary material
Source: PubMed Central journal article supplement (PMC7878277)
Supplement: NIHMS1621591-supplement-1.pdf [file NIHMS1621591-supplement-1.pdf]

## **Supplement Material**

**Supplement Table ST1.** Recruitment Activity by Month

**Supplement Table ST2.** MyChart Query

**Supplement Table ST3.** Facebook Query

**Supplement Table ST4.** Demographic Characteristics by Patient Portal Activity Group

**Supplement Table ST5.** Number of Additional Responses, Screening Visit Completions, and Enrollees Needed for Cost Equivalence

**Supplement Figure SF1.** MyChart Patient Portal Message

**Supplement Figure SF2.** Periodical Advertisement

**Supplement Figure SF3.** Source of Inquiry

**ST1. Recruitment Activity by Month**

| <b>Month</b> | <b>Recruitment Activity</b>                                                                                                                                                                                                                             | <b>Response Recorded (N)</b> |
|--------------|---------------------------------------------------------------------------------------------------------------------------------------------------------------------------------------------------------------------------------------------------------|------------------------------|
| <b>2018</b>  |                                                                                                                                                                                                                                                         |                              |
| April        | <ul style="list-style-type: none"> <li>• Trial website became active</li> </ul>                                                                                                                                                                         |                              |
| May          |                                                                                                                                                                                                                                                         |                              |
| June         | <ul style="list-style-type: none"> <li>• 555 MyChart messages sent</li> </ul>                                                                                                                                                                           | 13                           |
| July         | <ul style="list-style-type: none"> <li>• Clinicaltrials.gov page went live</li> <li>• 500 MyChart messages sent</li> <li>• 1895 Inactive MyChart direct mail letters sent</li> </ul>                                                                    | 68                           |
| August       | <ul style="list-style-type: none"> <li>• 264 MyChart messages sent</li> </ul>                                                                                                                                                                           | 24                           |
| September    |                                                                                                                                                                                                                                                         | 4                            |
| October      |                                                                                                                                                                                                                                                         | 4                            |
| November     |                                                                                                                                                                                                                                                         | 2                            |
| December     | <ul style="list-style-type: none"> <li>• 1188 active MyChart direct mail letters sent</li> <li>• 74 MyChart messages sent</li> </ul>                                                                                                                    | 20                           |
| <b>2019</b>  |                                                                                                                                                                                                                                                         |                              |
| January      | <ul style="list-style-type: none"> <li>• 676 Previous participants direct mail letters sent</li> <li>• 1892 Repeat inactive MyChart direct mail letters sent</li> <li>• Newspaper periodicals activated*</li> <li>• 20 MyChart messages sent</li> </ul> | 27                           |
| February     | <ul style="list-style-type: none"> <li>• Periodicals remain activated</li> <li>• Version 1 Facebook Ad goes live</li> </ul>                                                                                                                             | 33                           |
| March        | <ul style="list-style-type: none"> <li>• 10341 Community direct mail letters sent</li> <li>• Version 2 Facebook ad goes live</li> <li>• 24 MyChart messages sent</li> </ul>                                                                             | 45                           |
| April        | <ul style="list-style-type: none"> <li>• Facebook ad ends</li> </ul>                                                                                                                                                                                    | 8                            |
| May          | <ul style="list-style-type: none"> <li>• Website stops allowing participants to sign-up</li> </ul>                                                                                                                                                      | 2                            |
| June         |                                                                                                                                                                                                                                                         | 1                            |

**ST2. MyChart Query**

| <b>Computable Phenotype Characteristics</b>                          | <b>Query Details</b>                                                                                                                                      |
|----------------------------------------------------------------------|-----------------------------------------------------------------------------------------------------------------------------------------------------------|
| Demographic Criteria<br>Health Conditions<br>Health Care Utilization | >18 years old, zip codes within reasonable distance to study location<br>ICD9 or 10 billing definition including the word “gout”<br>All network locations |

**ST3. Facebook Query**

| <b>Version 1</b>                      |                                                                                                                                                                                                                                                                                                            |
|---------------------------------------|------------------------------------------------------------------------------------------------------------------------------------------------------------------------------------------------------------------------------------------------------------------------------------------------------------|
| Location                              | Eldersburg (+25 miles), Maryland, United States                                                                                                                                                                                                                                                            |
| Age                                   | 18-65+ years                                                                                                                                                                                                                                                                                               |
| Gender                                | Male                                                                                                                                                                                                                                                                                                       |
| Language                              | English (UK) or English (US)                                                                                                                                                                                                                                                                               |
| Detailed Targeting, People Who Match: | Interests: Rheumatology, American College of Rheumatology, Diabetes Mellitus Type 2 Awareness, World Hypertension Day, The Obesity Society, Alcohol, Blood Pressures, Ethanol, Alcoholic Beverages, Weight Loss (Fitness & Wellness), Gouts, Uric Acid, Arthritis Foundation or Management of Hypertension |
| Detailed Targeting Expansion          | Off                                                                                                                                                                                                                                                                                                        |
| <b>Version 2</b>                      |                                                                                                                                                                                                                                                                                                            |
| Location                              | Eldersburg (+25 miles), Maryland, United States                                                                                                                                                                                                                                                            |
| Age                                   | 18-65+ years                                                                                                                                                                                                                                                                                               |
| Gender                                | Male                                                                                                                                                                                                                                                                                                       |
| Language                              | English (UK) or English (US)                                                                                                                                                                                                                                                                               |
| Detailed Targeting, People Who Match: | Interests: Sports, Automotive Industry, Motor Vehicle, Sports game or Sports car<br>Job title: Car Driver                                                                                                                                                                                                  |
| Detailed Targeting Expansion          | Off                                                                                                                                                                                                                                                                                                        |

**ST4. Demographic Characteristics by Patient Portal Activity Groups**

|                           | Active Users | Non-Active Users |
|---------------------------|--------------|------------------|
| Mean age (years)          | 65           | 68               |
| Female, %                 | 25           | 34               |
| <i>Race</i>               |              |                  |
| White, %                  | 56           | 34               |
| African American/Black, % | 35           | 58               |
| Asian/Pacific Islander, % | 5            | 3                |
| American Indian, %        | <1           | <1               |
| Other/Unknown, %          | 3            | 4                |

Note: These data were based on the initial query. Active users could have been added to this list after initial query.

**ST5. Number of Additional Responses, Screening Visit Completions, and Enrollees Needed for Cost Equivalence**

| <b>Responses</b>                                |           |                |                         |                                                                                          |
|-------------------------------------------------|-----------|----------------|-------------------------|------------------------------------------------------------------------------------------|
| Source                                          | Cost (\$) | Responded      | Cost (\$)/Response      | Number of Additional Responses Needed for Cost/Response to Equal the Reference           |
| <i>EMR-Based Methods</i>                        |           |                |                         |                                                                                          |
| MyChart Patient Portal Messaging                | 2,948.00  | 57             | 51.72                   | 31                                                                                       |
| Postal Mailing: Active MyChart Users            | 1,598.20  | 21             | 76.10                   | 27                                                                                       |
| Postal Mailing: Non-Active MyChart              | 1,685.25  | 50             | 33.71                   | Reference                                                                                |
| Postal Mailing: Repeat Non-Active MyChart Users | 1,698.66  | 22             | 77.21                   | 29                                                                                       |
| <i>Non-EMR Based Methods</i>                    |           |                |                         |                                                                                          |
| Postal Mailing: Previous Participants           | 148.02    | 3              | 49.34                   | 2                                                                                        |
| Facebook                                        | 2,353.15  | 26             | 84.15                   | 44                                                                                       |
| Postal Mailing: Community Mailing               | 8,643.61  | 46             | 187.90                  | 211                                                                                      |
| Periodicals                                     | 1,828.00  | 7              | 261.14                  | 48                                                                                       |
| <b>Screening Visit Completions</b>              |           |                |                         |                                                                                          |
| Source                                          | Cost (\$) | SV Completions | Cost (\$)/SV Completion | Number of Additional SV Completions Needed for Cost/SV Completion to Equal the Reference |
| <i>EMR-Based Methods</i>                        |           |                |                         |                                                                                          |
| MyChart Patient Portal Messaging                | 2,948.00  | 21             | 140.38                  | 2                                                                                        |
| Postal Mailing: Active MyChart Users            | 1,598.20  | 2              | 799.1                   | 11                                                                                       |
| Postal Mailing: Non-Active MyChart              | 1,685.25  | 13             | 129.63                  | Reference                                                                                |
| Postal Mailing: Repeat Non-Active MyChart Users | 1,698.66  | 7              | 242.67                  | 7                                                                                        |
| <i>Non-EMR Based Methods</i>                    |           |                |                         |                                                                                          |
| Postal Mailing: Previous Participants           | 148.02    | 1              | 148.02                  | 1                                                                                        |
| Facebook                                        | 2,353.15  | 5              | 470.63                  | 14                                                                                       |
| Postal Mailing: Community Mailing               | 8,643.61  | 11             | 785.78                  | 56                                                                                       |
| Periodicals                                     | 1,828.00  | 2              | 914                     | 13                                                                                       |
| <b>Enrollees</b>                                |           |                |                         |                                                                                          |

| Source                                          | Cost (\$) | Enrollees | Cost (\$)/Enrollee | Number of Additional Enrollees Needed for Cost/Enrollee to Equal the Reference |
|-------------------------------------------------|-----------|-----------|--------------------|--------------------------------------------------------------------------------|
| <i>EMR-Based Methods</i>                        |           |           |                    |                                                                                |
| MyChart Patient Portal Messaging                | 2,948.00  | 12        | 245.67             | 1                                                                              |
| Postal Mailing: Active MyChart Users            | 1,598.20  | 1         | 1,598.20           | 6                                                                              |
| Postal Mailing: Non-Active MyChart Users        | 1,685.25  | 7         | 240.75             | Reference                                                                      |
| Postal Mailing: Repeat Non-Active MyChart Users | 1,698.66  | 4         | 424.67             | 4                                                                              |
| <i>Non-EMR Based Methods</i>                    |           |           |                    |                                                                                |
| Postal Mailing: Previous Participants           | 148.02    | 0         | -                  | 1                                                                              |
| Facebook                                        | 2,353.15  | 4         | 588.29             | 6                                                                              |
| Postal Mailing: Community Mailing               | 8,643.61  | 7         | 1,234.80           | 29                                                                             |
| Periodicals                                     | 1,828.00  | 1         | 1,828.00           | 7                                                                              |

Note: SV: Screening Visit; Per unit cost (\$0.22) of Previous Participant Mailing was based on the cost of paper, ink, postage, and envelope prices. Per unit cost of Active MyChart (\$0.88), Inactive MyChart (\$0.28), Repeat Inactive (\$0.88) and Community Mailing (\$0.68) was based on the cost of brochure printing, mail house labeling fees, mail house envelope fees, mail house delivery fees, USPS shipping fees, and returned postcards postage and handling fees. Community mailing had an added fee per name of male individuals (\$0.60). Annual fees for bulk mailing and business reply through USPS applied to all unique mailing types (\$540). One-time query development fee applied to Active and Inactive MyChart mailing types (\$588).

## SF1. MyChart Patient Portal Message

In addition to providing medical care, physicians at Johns Hopkins conduct research with the ultimate goal of improving health. Hopkins researchers are looking for volunteers to participate in a research program, called the Diet Gout (DiGo) Trial, that tests the effects of a healthy diet on uric acid levels in the blood, which is an important risk factor for gout flares. You are receiving this email because you might qualify for this study based on your age and geographic location.

Benefits to participation include \$420 of groceries over 4 weeks, up to \$75 for lab work, laboratory results, blood pressure measurements, and an opportunity to contribute to our knowledge about how diet affects gout.

Is the Diet Gout (DiGo) Trial for you?

If you answer YES to all 3 of these questions, you may be eligible:

Are you age 18 or older?

Have you been told you have gout by a health professional?

Are you not taking any medications to lower uric acid (no allopurinol, no febuxostat, no probenecid)?

If the Diet Gout (DiGo) Trial seems right for you, or to learn more:

Call: (410) 281-1600

Email: [digo@jhu.edu](mailto:digo@jhu.edu)

Visit: [www.digotrial.org](http://www.digotrial.org)

Sincerely,

Daniel E. Ford, MD, MPH  
Vice Dean for Clinical Investigation  
Director, Institute for Clinical and Translational Research  
ICTR Research Recruitment Office

Edgar R Miller III, MD, PHD  
Principal Investigator of STURDY  
Protocol #: IRB00153409

This message was approved by Johns Hopkins Medicine IRB.

Please do not respond to this MyChart message. For any questions about this trial, please use the contact information above. For more information and frequently asked questions (FAQs) related to research recruitment through MyChart, visit <https://ictr.johnshopkins.edu/community/community-involvement/mychart-recruitment-messages/>. To unsubscribe from all future MyChart research recruitment messages, please email [research\\_recruitment@jhmi.edu](mailto:research_recruitment@jhmi.edu). Provide feedback on MyChart messaging here: [https://jhmi.co1.qualtrics.com/jfe/form/SV\\_8wTel1xHVl0RFrv](https://jhmi.co1.qualtrics.com/jfe/form/SV_8wTel1xHVl0RFrv)



**SF2. The Beacon Periodical Advertisement**

**Have You Ever Had Gout?**

If you answered yes, you may be eligible for the DiGo Trial, a research program to look at a diet to lower risk for gout.

**All participants will receive \$105 in food for 4 weeks and up to \$75 for lab work**

**You may be eligible if you:**

- Are at least 18 years of age
- Have had gout or high uric acid level
- And you do not take medication to lower uric acid

**For more information, call today:  
410-281-1600**

Researchers at Johns Hopkins University are joining with Harvard Medical School scientists to conduct this important research study.

Protocol Title: Diet Gout (DiGo) Trial  
Application No.: IRB00153409  
Principal Investigator: Edgar R. Miller 3rd, MD PhD

**SF3. Source of Inquiry**

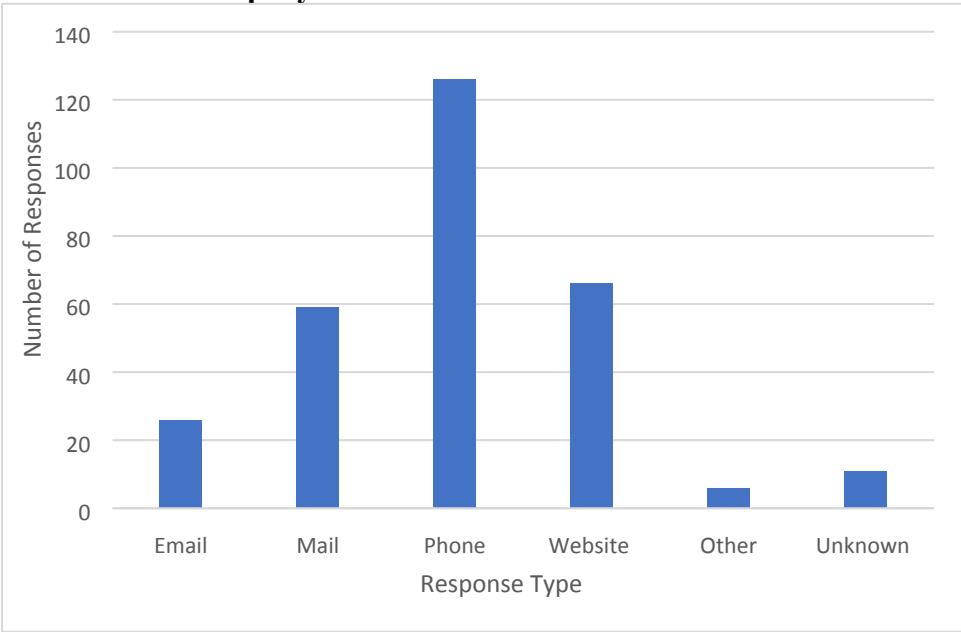

Title: Use of electronic recruitment methods in a clinical trial of adults with gout

Manuscript ID: CT-20-0102.R1

Funding Information: U.S. Department of Health and Human Services >  
National Institutes of Health >  
**National Center for Advancing Translational Sciences**  
ULITR003098

U.S. Department of Health and Human Services >  
National Institutes of Health >  
**National Heart, Lung, and Blood Institute**  
7K23HL135273

**National Institute for Nursing Research** ✖  
T32NR012704

Submitting Author:

Save  [Juraschek, Stephen P \(proxy\)](#)

---

| <i>primary affiliation</i>                                                                                                                                                     | <i>secondary affiliation</i>                                    |
|--------------------------------------------------------------------------------------------------------------------------------------------------------------------------------|-----------------------------------------------------------------|
| <ul style="list-style-type: none"> <li>General Medicine &amp; Primary Care<br/>330 Brookline Avenue, CO-1309,<br/>#211 Boston Massachusetts 02215<br/>United States</li> </ul> | <ul style="list-style-type: none"> <li>United States</li> </ul> |

Authors & Institutions:

 [Miller, Hailey N proxy](#)

 <https://orcid.org/000-0001-6045-6542> ✓

- Johns Hopkins University ✓ - School of Nursing Baltimore United States

- Johns Hopkins University ✓ - Institute for Clinical and Translation

al Research  
Baltimore,  
Maryland  
United  
States

 [Charleston,  
Jeanne  
proxy](#)

- Johns  
Hopkins  
University  
✓ - Institute  
for Clinical  
and  
Translation  
al Research  
Baltimore,  
Maryland  
United  
States

Johns  
Hopkins  
University  
School of  
Medicine ✓  
- Welch  
Center for  
Prevention,  
Epidemiolo  
gy, and  
Clinical  
Research  
Baltimore,  
Maryland  
United  
States

 [Wu, Beiwen  
proxy](#)

- Johns  
Hopkins  
University  
School of  
Medicine ✓  
- Welch  
Center for  
Prevention,  
Epidemiolo  
gy, and  
Clinical

 [Gleason, Kelly T proxy](#)

Research  
Baltimore,  
Maryland  
United  
States

- Johns  
Hopkins  
University  
✓ - School  
of Nursing  
Baltimore,  
Maryland  
United  
States

Johns  
Hopkins  
University  
✓ - Institute  
for Clinical  
and  
Translational Research  
Baltimore  
United  
States

 [White, Karen proxy](#)

- Johns  
Hopkins  
University  
School of  
Medicine ✓  
- Welch  
Center for  
Prevention,  
Epidemiology, and  
Clinical  
Research  
Baltimore,  
Maryland  
United  
States

 [Dennison Himmelfarb,](#)

- Johns  
Hopkins  
University

[Cheryl R proxy](#)

✓- School of Nursing  
Baltimore  
United States

Johns Hopkins  
University

✓- Institute for Clinical and  
Translational Research  
Baltimore, Maryland  
United States

 [Ford, Daniel proxy](#)

• Johns Hopkins  
University  
✓- Institute for Clinical and  
Translational Research  
Baltimore, Maryland  
United States

Johns Hopkins  
University  
School of Medicine ✓  
- Welch  
Center for Prevention,  
Epidemiology, and  
Clinical Research  
Baltimore, Maryland

 [Plante, Timothy Blake proxy](#)

 <https://orcid.org/000-0001-9992-9597> ✓

United States

• Robert Larner MD College of Medicine ✓

- Department of Medicine Burlington, Vermont United States

 [Gelber, Allan C proxy](#)

• Johns Hopkins University School of Medicine ✓

- Welch Center for Prevention, Epidemiology, and Clinical Research Baltimore, Maryland United States

Johns Hopkins University School of Medicine ✓

- Department of Medicine Baltimore, Maryland United States

 [Appel, Lawrence proxy](#)

• Johns Hopkins University

School of  
Medicine ✓  
- Welch  
Center for  
Prevention,  
Epidemiolo  
gy, and  
Clinical  
Research  
Baltimore,  
Maryland  
United  
States

 [Miller, Edgar  
proxy](#)

• Johns  
Hopkins  
University  
School of  
Medicine ✓  
- Welch  
Center for  
Prevention,  
Epidemiolo  
gy, and  
Clinical  
Research  
Baltimore,  
Maryland  
United  
States

 [Juraschek,  
Stephen P  
proxy](#)

• Beth Israel  
Deaconess  
Medical  
Center ✓-  
Department  
of Medicine  
Boston,  
Massachuse  
tts  
United  
States

Harvard  
Medical  
School ✓-  
Department



of Medicine  
Boston,  
Massachuse  
ts  
United  
States

Contact Author (populates the  
##PROLE\_AUTHOR\_## e-mail tags):

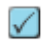

Save

Current Contact Author: Juraschek, Stephen P  
([proxy](#))

Running Head:

Recruitment methods in adults with gout

Keywords:

Recruitment methods; clinical trials; randomized  
control trial; electronic medical records; disparities
